# Supplementary material for: Diallyl sulfide protects against dilated cardiomyopathy via inhibition of oxidative stress and apoptosis in mice
Source: PubMed Central journal article supplement — Mol Med Rep. 2021 Oct 13;24(6):852. doi: 10.3892/mmr.2021.12492 (PMC8532119; doi:10.3892/mmr.2021.12492), 2021-10-13
Supplement: Supplementary_Data.pdf [file Supplementary_Data.pdf]

Figure S1. Ameliorative effect of DAS on pathological phenotype of cardiomyopathy in H9c2 cells. (A) Expression level of CYP2E1 in H9c2 cells after treatment of DAS (12 h; 100  $\mu\text{mol/l}$ ) and ISO (12 h; 50  $\mu\text{mol/l}$ ) in control, ISO, control + DAS and ISO + DAS groups, as detected via western blotting. (B) Semi-quantitative analysis using GAPDH for normalization (n=3). (C) Confocal images from calcein-AM and PI co-stained H9c2 cells after treatment of DAS and ISO. Scale bar, 250  $\mu\text{m}$ . (D) Quantitative analysis of calcein-AM and PI co-stained H9c2 cells (n=3). \* $P < 0.05$ , \*\*\* $P < 0.001$ ; # $P < 0.05$ , ## $P < 0.01$ . DAS, diallyl sulfide; CYP2E1, cytochrome P450 family 2 subfamily E member 1; ISO, isoprenaline hydrochloride.

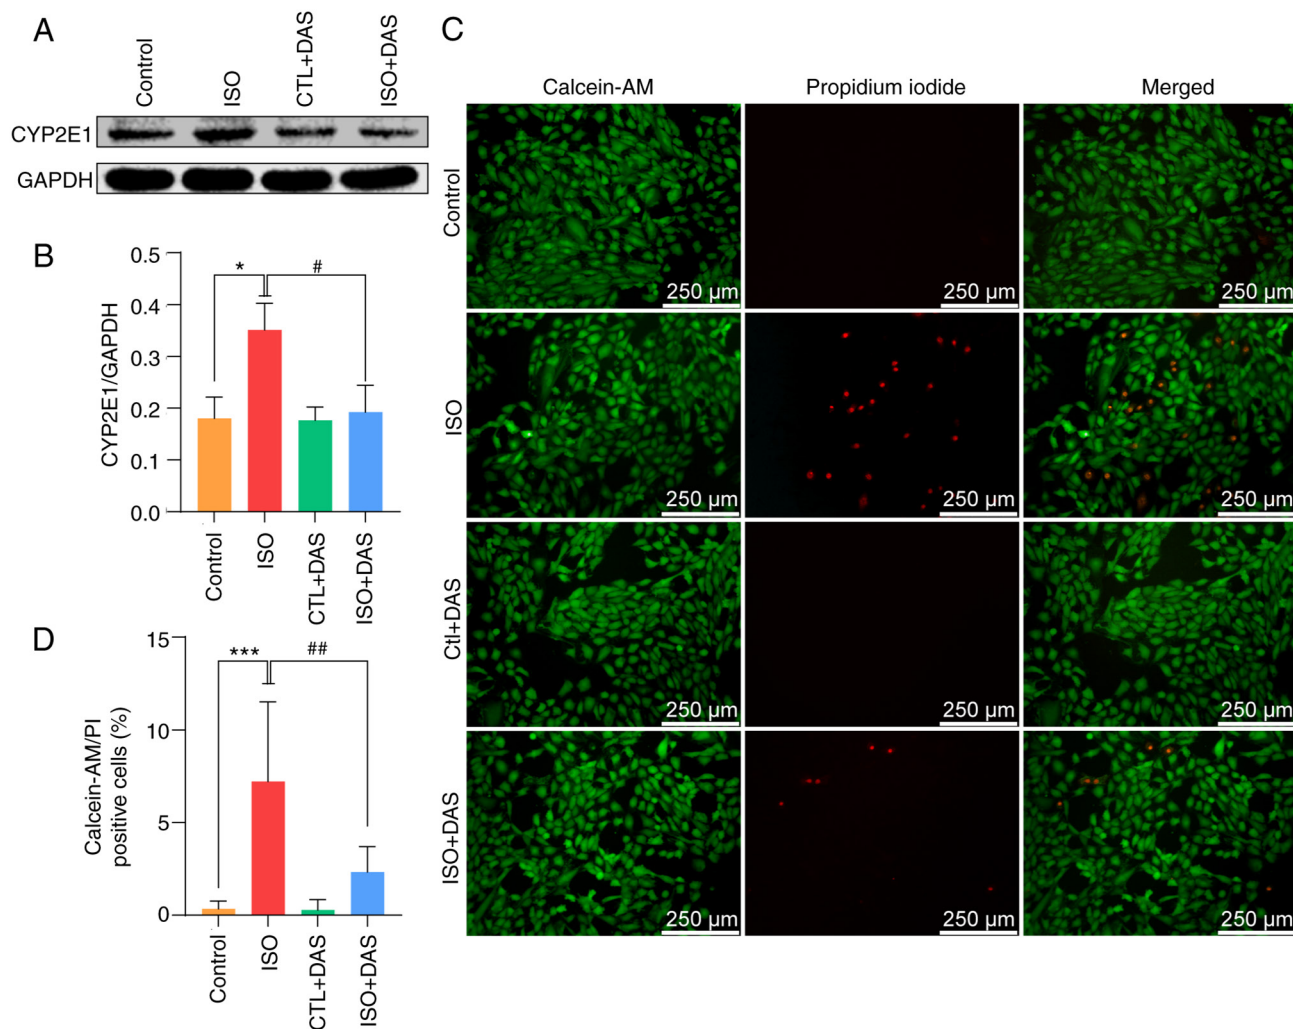

Table SI. Echocardiographic characteristics of mice treated with DAS for 2 weeks.

| Characteristic | NTG (n=8)  | cTnT <sup>R141W</sup> (n=7) | 400 mg/kg DAS (n=8)     | 200 mg/kg DAS (n=9)     | Enalaprilat (n=7)        |
|----------------|------------|-----------------------------|-------------------------|-------------------------|--------------------------|
| LVESD, mm      | 3.22±0.31  | 4.33±0.40 <sup>a</sup>      | 3.18±0.46 <sup>d</sup>  | 3.21±0.27 <sup>d</sup>  | 3.51±0.47 <sup>c</sup>   |
| LVEDD, mm      | 4.17±0.30  | 5.07±0.37 <sup>a</sup>      | 4.26±0.26 <sup>d</sup>  | 4.20±0.15 <sup>d</sup>  | 4.37±0.32 <sup>d</sup>   |
| LVPWS, mm      | 0.76±0.05  | 0.61±0.08 <sup>a</sup>      | 0.72±0.06 <sup>c</sup>  | 0.72±0.06 <sup>c</sup>  | 0.75±0.07 <sup>d</sup>   |
| LVPWD, mm      | 0.62±0.04  | 0.51±0.03 <sup>a</sup>      | 0.58±0.03 <sup>b</sup>  | 0.61±0.06 <sup>d</sup>  | 0.63±0.05 <sup>d,e</sup> |
| LVAWS, mm      | 0.93±0.08  | 0.69±0.07 <sup>a</sup>      | 0.84±0.06 <sup>d</sup>  | 0.82±0.06 <sup>c</sup>  | 0.78±0.07                |
| LVAWD, mm      | 0.74±0.06  | 0.55±0.06 <sup>a</sup>      | 0.69±0.04 <sup>d</sup>  | 0.63±0.02 <sup>c</sup>  | 0.63±0.06 <sup>b,e</sup> |
| LVEF, %        | 48.28±3.97 | 30.09±2.32 <sup>a</sup>     | 43.07±9.26 <sup>c</sup> | 47.47±7.05 <sup>d</sup> | 40.68±11.03 <sup>b</sup> |
| LVFS, %        | 24.09±2.29 | 14.19±1.10 <sup>a</sup>     | 23.36±5.82 <sup>d</sup> | 23.73±4.18 <sup>d</sup> | 20.17±5.82 <sup>b</sup>  |

<sup>a</sup>P<0.001 vs. NTG mice; <sup>b</sup>P<0.05, <sup>c</sup>P<0.01, <sup>d</sup>P<0.001 vs. cTnT<sup>R141W</sup> mice; <sup>e</sup>P<0.05 vs. 400 mg/kg DAS mice. LVESD, left ventricular end-systole diameter; LVEDD, left ventricular end-diastole diameter; LVPWS, left ventricular ventricle posterior wall at end systole; LVPWD, left ventricular posterior wall at end diastole; LVAWS, left ventricular anterior wall at end systole; LVAWD, left ventricular anterior wall at end diastole; LVEF, left ventricular ejection fraction; LVFS, left ventricular fractional shortening; DAS, diallyl sulfide; NTG, non-transgenic.

Table SII. Echocardiographic characteristics of mice treated with DAS for 4 weeks.

| Characteristic | NTG (n=8)  | cTnT <sup>R141W</sup> (n=7) | 400 mg/kg DAS (n=7)     | 200 mg/kg DAS (n=8)     | Enalaprilat (n=7)        |
|----------------|------------|-----------------------------|-------------------------|-------------------------|--------------------------|
| LVESD, mm      | 2.98±0.22  | 4.19±0.87 <sup>a</sup>      | 3.32±0.15 <sup>c</sup>  | 3.44±0.30 <sup>b</sup>  | 3.71±0.37 <sup>e</sup>   |
| LVEDD, mm      | 3.92±0.2   | 5.00±0.63 <sup>a</sup>      | 4.20±0.12 <sup>d</sup>  | 4.18±0.19 <sup>d</sup>  | 4.47±0.29 <sup>b,e</sup> |
| LVPWS, mm      | 0.82±0.05  | 0.64±0.08 <sup>a</sup>      | 0.77±0.05 <sup>d</sup>  | 0.67±0.05               | 0.71±0.03 <sup>b,e</sup> |
| LVPWD, mm      | 0.62±0.05  | 0.57±0.07                   | 0.62±0.06               | 0.61±0.05               | 0.59±0.07                |
| LVAWS, mm      | 0.97±0.07  | 0.76±0.07 <sup>a</sup>      | 0.92±0.06 <sup>d</sup>  | 0.81±0.06               | 0.79±0.04 <sup>e</sup>   |
| LVAWD, mm      | 0.77±0.06  | 0.63±0.06 <sup>a</sup>      | 0.71±0.05 <sup>b</sup>  | 0.66±0.02               | 0.67±0.05                |
| LVEF, %        | 47.50±2.57 | 35.88±6.05 <sup>a</sup>     | 43.72±3.61 <sup>b</sup> | 42.75±5.90 <sup>b</sup> | 35.88±6.32 <sup>e</sup>  |
| LVFS, %        | 23.51±1.50 | 17.23±3.23 <sup>a</sup>     | 21.50±2.07 <sup>b</sup> | 21.02±3.45              | 17.10±3.49 <sup>e</sup>  |

<sup>a</sup>P<0.001 vs. NTG mice; <sup>b</sup>P<0.05, <sup>c</sup>P<0.01, <sup>d</sup>P<0.001 vs. cTnT<sup>R141W</sup> mice; <sup>e</sup>P<0.05, vs. 400 mg/kg DAS mice. LVESD, left ventricular end-systole diameter; LVEDD, left ventricular end-diastole diameter; LVPWS, left ventricular ventricle posterior wall at end systole; LVPWD, left ventricular posterior wall at end diastole; LVAWS, left ventricular anterior wall at end systole; LVAWD, left ventricular anterior wall at end diastole; LVEF, left ventricular ejection fraction; LVFS, left ventricular fractional shortening; DAS, diallyl sulfide; NTG, non-transgenic.

Table SIII. Echocardiographic characteristics of mice treated with DAS for 6 weeks.

| Characteristic | NTG (n=7)  | cTnTR <sup>141W</sup> (n=7) | 400 mg/kg DAS (n=7)     | 200 mg/kg DAS (n=7) | Enalaprilat (n=7)        |
|----------------|------------|-----------------------------|-------------------------|---------------------|--------------------------|
| LVESD, mm      | 2.80±0.29  | 3.88±0.26 <sup>b</sup>      | 3.01±0.32 <sup>e</sup>  | 3.51±0.32           | 3.45±0.18 <sup>e,f</sup> |
| LVEDD, mm      | 3.82±0.21  | 4.57±0.30 <sup>b</sup>      | 3.97±0.15 <sup>e</sup>  | 4.28±0.29           | 4.22±0.19 <sup>e,f</sup> |
| LVPWS, mm      | 0.92±0.06  | 0.71±0.05 <sup>b</sup>      | 0.81±0.04 <sup>c</sup>  | 0.77±0.07           | 0.88±0.07 <sup>e</sup>   |
| LVPWD, mm      | 0.72±0.11  | 0.61±0.07 <sup>a</sup>      | 0.63±0.05               | 0.64±0.03           | 0.74±0.08 <sup>d,f</sup> |
| LVAWS, mm      | 0.97±0.07  | 0.79±0.08 <sup>b</sup>      | 0.90±0.03               | 0.83±0.07           | 0.99±0.12 <sup>e</sup>   |
| LVAWD, mm      | 0.81±0.05  | 0.63±0.05 <sup>b</sup>      | 0.73±0.04 <sup>c</sup>  | 0.70±0.06           | 0.81±0.07 <sup>e,f</sup> |
| LVEF, %        | 52.34±2.93 | 34.38±5.37 <sup>b</sup>     | 51.65±6.40 <sup>e</sup> | 38.39±5.83          | 38.32±4.03 <sup>f</sup>  |
| LVFS, %        | 26.54±1.78 | 17.10±2.83 <sup>b</sup>     | 26.24±3.98 <sup>e</sup> | 18.50±3.25          | 18.49±2.17 <sup>f</sup>  |

<sup>a</sup>P<0.05, <sup>b</sup>P<0.001 vs. NTG mice; <sup>c</sup>P<0.05, <sup>d</sup>P<0.01, <sup>e</sup>P<0.001 vs. cTnTR<sup>141W</sup> mice; <sup>f</sup>P<0.05 vs. 400 mg/kg DAS mice. LVESD, left ventricular end-systole diameter; LVEDD, left ventricular end-diastole diameter; LVPWS, left ventricular ventricle posterior wall at end systole; LVPWD, left ventricular posterior wall at end diastole; LVAWS, left ventricular anterior wall at end systole; LVAWD, left ventricular anterior wall at end diastole; LVEF, left ventricular ejection fraction; LVFS, left ventricular fractional shortening; DAS, diallyl sulfide; NTG, non-transgenic.

Table SIV. Echocardiographic characteristics of NTG mice treated with DAS.

| Characteristic | 2 weeks    |                               | 4 weeks    |                               | 6 weeks    |                               |
|----------------|------------|-------------------------------|------------|-------------------------------|------------|-------------------------------|
|                | NTG (n=8)  | NTG + 400 mg/kg<br>DAS (n=10) | NTG (n=8)  | NTG + 400 mg/kg<br>DAS (n=10) | NTG (n=7)  | NTG + 400 mg/kg<br>DAS (n=10) |
| LVESD, mm      | 3.22±0.31  | 3.24±0.24                     | 2.98±0.22  | 2.88±0.17                     | 2.80±0.29  | 2.59±0.19                     |
| LVEDD, mm      | 4.17±0.30  | 4.20±0.17                     | 3.92±0.2   | 3.97±0.10                     | 3.82±0.21  | 3.72±0.28                     |
| LVPWS, mm      | 0.76±0.05  | 0.75±0.12                     | 0.82±0.05  | 0.80±0.09                     | 0.92±0.06  | 0.76±0.15                     |
| LVPWD, mm      | 0.62±0.04  | 0.61±0.10                     | 0.62±0.05  | 0.59±0.09                     | 0.72±0.11  | 0.65±0.13                     |
| LVAWS, mm      | 0.93±0.08  | 0.89±0.13                     | 0.97±0.07  | 0.85±0.15                     | 0.97±0.07  | 0.88±0.18                     |
| LVAWD, mm      | 0.74±0.06  | 0.70±0.10                     | 0.77±0.06  | 0.69±0.15                     | 0.81±0.05  | 0.69±0.11                     |
| LVEF, %        | 48.28±3.97 | 45.52±8.92                    | 47.50±2.57 | 53.35±7.00                    | 52.34±2.93 | 57.53±9.80                    |
| LVFS, %        | 24.09±2.29 | 22.62±5.28                    | 23.51±1.50 | 27.24±4.43                    | 26.54±1.78 | 30.03±6.58                    |

LVESD, left ventricular end-systole diameter; LVEDD, left ventricular end-diastole diameter; LVPWS, left ventricular ventricle posterior wall at end systole; LVPWD, left ventricular posterior wall at end diastole; LVAWS, left ventricular anterior wall at end systole; LVAWD, left ventricular anterior wall at end diastole; LVEF, left ventricular ejection fraction; LVFS, left ventricular fractional shortening; DAS, diallyl sulfide; NTG, non-transgenic.
